# Supplementary material
Source: PubMed Central journal article supplement (PMC6682821)
Supplement: CJN.01480219SupplementaryData.pdf [file CJN.01480219SupplementaryData.pdf]

*Supplemental material is neither peer-reviewed nor thoroughly edited by CJASN. The authors alone are responsible for the accuracy and presentation of the material.*

## **Supplemental Table of Contents**

Supplemental Table 1 includes information on selection of the study cohort.

Supplemental Table 2 includes unadjusted rates of specific complications for patients with and without end-stage kidney disease.

Supplemental Table 3 includes raw data for procedure utilization.

Supplemental Table 4 includes specific codes for bariatric surgery and our exclusion criteria diagram.

Supplemental Table 5 includes risk-adjusted outcome rates over time for patients with ESKD.

Supplemental Table 6 includes all complication codes for ICD-9 and ICD-10 specifications.

Supplemental material is neither peer-reviewed nor thoroughly edited by CJASN. The authors alone are responsible for the accuracy and presentation of the material.

**Supplemental Table 1:** Note: All patients with a diagnosis of stomach cancer are excluded.

| ICD-9 | ICD-10  | Operation                |
|-------|---------|--------------------------|
| 4382  | 0DB64Z3 | Sleeve gastrectomy       |
| 4389  | 0DB60Z3 | Sleeve gastrectomy       |
| 4389  | 0DB60ZZ | Sleeve gastrectomy       |
| 4389  | 0DB63Z3 | Sleeve gastrectomy       |
| 4389  | 0DB63ZZ | Sleeve gastrectomy       |
| 4389  | 0DB67Z3 | Sleeve gastrectomy       |
| 4389  | 0DB67ZZ | Sleeve gastrectomy       |
| 4389  | 0DB68Z3 | Sleeve gastrectomy       |
| 4431  | 0D160ZA | Roux-en-y gastric bypass |
| 4431  | 0D168ZA | Roux-en-y gastric bypass |
| 4438  | 0D16479 | Roux-en-y gastric bypass |
| 4438  | 0D1647A | Roux-en-y gastric bypass |
| 4438  | 0D1647B | Roux-en-y gastric bypass |
| 4438  | 0D1647L | Roux-en-y gastric bypass |
| 4438  | 0D164J9 | Roux-en-y gastric bypass |
| 4438  | 0D164JA | Roux-en-y gastric bypass |
| 4438  | 0D164JB | Roux-en-y gastric bypass |
| 4438  | 0D164JL | Roux-en-y gastric bypass |
| 4438  | 0D164K9 | Roux-en-y gastric bypass |
| 4438  | 0D164KA | Roux-en-y gastric bypass |
| 4438  | 0D164KB | Roux-en-y gastric bypass |
| 4438  | 0D164KL | Roux-en-y gastric bypass |
| 4438  | 0D164Z9 | Roux-en-y gastric bypass |
| 4438  | 0D164ZA | Roux-en-y gastric bypass |
| 4438  | 0D164ZB | Roux-en-y gastric bypass |
| 4438  | 0D164ZL | Roux-en-y gastric bypass |
| 4439  | 0D16079 | Roux-en-y gastric bypass |
| 4439  | 0D1607A | Roux-en-y gastric bypass |
| 4439  | 0D1607B | Roux-en-y gastric bypass |
| 4439  | 0D1607L | Roux-en-y gastric bypass |
| 4439  | 0D160J9 | Roux-en-y gastric bypass |
| 4439  | 0D160JA | Roux-en-y gastric bypass |
| 4439  | 0D160JB | Roux-en-y gastric bypass |
| 4439  | 0D160JL | Roux-en-y gastric bypass |
| 4439  | 0D160K9 | Roux-en-y gastric bypass |
| 4439  | 0D160KA | Roux-en-y gastric bypass |
| 4439  | 0D160KB | Roux-en-y gastric bypass |
| 4439  | 0D160KL | Roux-en-y gastric bypass |

*Supplemental material is neither peer-reviewed nor thoroughly edited by CJASN. The authors alone are responsible for the accuracy and presentation of the material.*

|      |         |                          |
|------|---------|--------------------------|
| 4439 | 0D160Z9 | Roux-en-y gastric bypass |
| 4439 | 0D160ZA | Roux-en-y gastric bypass |
| 4439 | 0D160ZB | Roux-en-y gastric bypass |
| 4439 | 0D160ZL | Roux-en-y gastric bypass |
| 4439 | 0D16879 | Roux-en-y gastric bypass |
| 4439 | 0D1687A | Roux-en-y gastric bypass |
| 4439 | 0D1687B | Roux-en-y gastric bypass |
| 4439 | 0D1687L | Roux-en-y gastric bypass |
| 4439 | 0D168J9 | Roux-en-y gastric bypass |
| 4439 | 0D168JA | Roux-en-y gastric bypass |
| 4439 | 0D168JB | Roux-en-y gastric bypass |
| 4439 | 0D168JL | Roux-en-y gastric bypass |
| 4439 | 0D168K9 | Roux-en-y gastric bypass |
| 4439 | 0D168KA | Roux-en-y gastric bypass |
| 4439 | 0D168KB | Roux-en-y gastric bypass |
| 4439 | 0D168KL | Roux-en-y gastric bypass |
| 4439 | 0D168Z9 | Roux-en-y gastric bypass |
| 4439 | 0D168ZA | Roux-en-y gastric bypass |
| 4439 | 0D168ZB | Roux-en-y gastric bypass |
| 4439 | 0D168ZL | Roux-en-y gastric bypass |
| 445  | 0DQ60ZZ | Roux-en-y gastric bypass |
| 445  | 0DQ63ZZ | Roux-en-y gastric bypass |
| 445  | 0DQ64ZZ | Roux-en-y gastric bypass |
| 445  | 0DQ67ZZ | Roux-en-y gastric bypass |
| 4468 | 0DQ64ZZ | Duodenal switch          |
| 4468 | 0DV64CZ | Duodenal switch          |
| 4495 | 0DV64CZ | Gastric banding          |
| 4496 | 0DW643Z | Gastric banding          |
| 4496 | 0DW64CZ | Gastric banding          |
| 4499 | 0DH60DZ | Gastric banding          |
| 4499 | 0DH63DZ | Gastric banding          |
| 4499 | 0DH64DZ | Gastric banding          |
| 4499 | 0DH67DZ | Gastric banding          |
| 4499 | 0DH68DZ | Gastric banding          |
| 4499 | 0DL60CZ | Gastric banding          |
| 4499 | 0DL60DZ | Gastric banding          |
| 4499 | 0DL60ZZ | Gastric banding          |
| 4499 | 0DL63CZ | Gastric banding          |
| 4499 | 0DL63DZ | Gastric banding          |
| 4499 | 0DL63ZZ | Gastric banding          |
| 4499 | 0DL64CZ | Gastric banding          |

*Supplemental material is neither peer-reviewed nor thoroughly edited by CJASN. The authors alone are responsible for the accuracy and presentation of the material.*

|      |         |                 |
|------|---------|-----------------|
| 4499 | ODL64DZ | Gastric banding |
| 4499 | ODL64ZZ | Gastric banding |
| 4499 | ODL67DZ | Gastric banding |
| 4499 | ODL67ZZ | Gastric banding |
| 4499 | ODL68DZ | Gastric banding |
| 4499 | ODL70CZ | Gastric banding |
| 4499 | ODL70DZ | Gastric banding |
| 4499 | ODL70ZZ | Gastric banding |
| 4499 | ODL73CZ | Gastric banding |
| 4499 | ODL73DZ | Gastric banding |
| 4499 | ODL73ZZ | Gastric banding |
| 4499 | ODL74CZ | Gastric banding |
| 4499 | ODL74DZ | Gastric banding |
| 4499 | ODL74ZZ | Gastric banding |
| 4499 | ODL77DZ | Gastric banding |
| 4499 | ODL77ZZ | Gastric banding |
| 4499 | ODL78DZ | Gastric banding |

*Supplemental material is neither peer-reviewed nor thoroughly edited by CJASN. The authors alone are responsible for the accuracy and presentation of the material.*

**Supplemental Table 2:** Unadjusted complication rates per 100 patients.

| Complication                               | Unadjusted Rates N (%)                         |                                          |
|--------------------------------------------|------------------------------------------------|------------------------------------------|
|                                            | Patients without<br>End-Stage Renal<br>Disease | Patients with<br>End-Stage Renal Disease |
| Pneumonia                                  | 446 (0.22)                                     | 8 (0.30)                                 |
| Myocardial infarction                      | 256 (0.13)                                     | 12 (0.44)                                |
| DVT/PE                                     | 1,549 (0.77)                                   | 25 (0.93)                                |
| Postoperative<br>gastrointestinal bleeding | 257 (0.13)                                     | 2 (0.07)                                 |
| Surgical site infection                    | 769 (0.38)                                     | 16 (0.59)                                |
| Sepsis                                     | 557 (0.28)                                     | 15 (0.56)                                |
| Cardiac arrest                             | 422 (0.21)                                     | 15 (0.56)                                |

Supplemental material is neither peer-reviewed nor thoroughly edited by CJASN. The authors alone are responsible for the accuracy and presentation of the material.

**Supplemental Table 3:** Crude rates of bariatric surgery for patients with and without end-stage kidney disease over time.

| Patients with ESKD |                 |                          |                |
|--------------------|-----------------|--------------------------|----------------|
| Year               | Number of Cases | Total Patient Population | Crude Rate (%) |
| Sleeve             |                 |                          |                |
| 2006               | 0               | 50                       | 0.0            |
| 2007               | 0               | 97                       | 0.0            |
| 2008               | 1               | 128                      | 0.8            |
| 2009               | 4               | 183                      | 2.2            |
| 2010               | 7               | 190                      | 3.7            |
| 2011               | 8               | 218                      | 3.7            |
| 2012               | 26              | 202                      | 12.9           |
| 2013               | 207             | 301                      | 68.8           |
| 2014               | 322             | 424                      | 75.9           |
| 2015               | 345             | 430                      | 80.2           |
| 2016               | 398             | 475                      | 83.8           |
| RYGB               |                 |                          |                |
| 2006               | 29              | 50                       | 58.0           |
| 2007               | 46              | 97                       | 47.4           |
| 2008               | 56              | 128                      | 43.8           |
| 2009               | 90              | 183                      | 49.2           |
| 2010               | 102             | 190                      | 53.7           |
| 2011               | 130             | 218                      | 59.6           |
| 2012               | 139             | 202                      | 68.8           |
| 2013               | 81              | 301                      | 26.9           |
| 2014               | 91              | 424                      | 21.5           |
| 2015               | 73              | 430                      | 17.0           |
| 2016               | 64              | 475                      | 13.5           |
| Band               |                 |                          |                |
| 2006               | 10              | 50                       | 20.0           |
| 2007               | 38              | 97                       | 39.2           |
| 2008               | 56              | 128                      | 43.8           |
| 2009               | 83              | 183                      | 45.4           |
| 2010               | 72              | 190                      | 37.9           |
| 2011               | 71              | 218                      | 32.6           |
| 2012               | 31              | 202                      | 15.3           |
| 2013               | 7               | 301                      | 2.3            |
| 2014               | 5               | 424                      | 1.2            |

Supplemental material is neither peer-reviewed nor thoroughly edited by CJASN. The authors alone are responsible for the accuracy and presentation of the material.

|      |   |     |     |
|------|---|-----|-----|
| 2015 | 5 | 430 | 1.2 |
| 2016 | 1 | 475 | 0.2 |

| Patients without ESKD |                 |                          |                |
|-----------------------|-----------------|--------------------------|----------------|
| Year                  | Number of Cases | Total Patient Population | Crude Rate (%) |
| Sleeve                |                 |                          |                |
| 2006                  | 4               | 7,804                    | 0.1            |
| 2007                  | 5               | 10,456                   | 0.0            |
| 2008                  | 8               | 14,980                   | 0.1            |
| 2009                  | 10              | 17,414                   | 0.1            |
| 2010                  | 21              | 17,788                   | 0.1            |
| 2011                  | 39              | 17,673                   | 0.2            |
| 2012                  | 1,064           | 16,443                   | 6.5            |
| 2013                  | 10,566          | 22,101                   | 47.8           |
| 2014                  | 14,340          | 24,660                   | 58.2           |
| 2015                  | 16,472          | 25,931                   | 63.5           |
| 2016                  | 17,415          | 25,854                   | 67.4           |
| RYGB                  |                 |                          |                |
| 2006                  | 4,206           | 7,804                    | 53.9           |
| 2007                  | 5,355           | 10,456                   | 51.2           |
| 2008                  | 7,615           | 14,980                   | 50.8           |
| 2009                  | 9,195           | 17,414                   | 52.8           |
| 2010                  | 10,170          | 17,788                   | 57.2           |
| 2011                  | 11,252          | 17,673                   | 63.7           |
| 2012                  | 12,119          | 16,443                   | 73.7           |
| 2013                  | 9,958           | 22,101                   | 45.1           |
| 2014                  | 9,114           | 24,660                   | 37.0           |
| 2015                  | 8,418           | 25,931                   | 32.5           |
| 2016                  | 7,770           | 25,854                   | 30.1           |
| Band                  |                 |                          |                |
| 2006                  | 1,627           | 7,804                    | 20.8           |
| 2007                  | 3,349           | 10,456                   | 32.0           |
| 2008                  | 5,662           | 14,980                   | 37.8           |
| 2009                  | 6,610           | 17,414                   | 38.0           |
| 2010                  | 6,239           | 17,788                   | 35.1           |
| 2011                  | 5,025           | 17,673                   | 28.4           |
| 2012                  | 2,026           | 16,443                   | 12.3           |
| 2013                  | 638             | 22,101                   | 2.9            |

Supplemental material is neither peer-reviewed nor thoroughly edited by CJASN. The authors alone are responsible for the accuracy and presentation of the material.

|      |     |        |     |
|------|-----|--------|-----|
| 2014 | 368 | 24,660 | 1.5 |
| 2015 | 270 | 25,931 | 1.0 |
| 2016 | 128 | 25,854 | 0.5 |

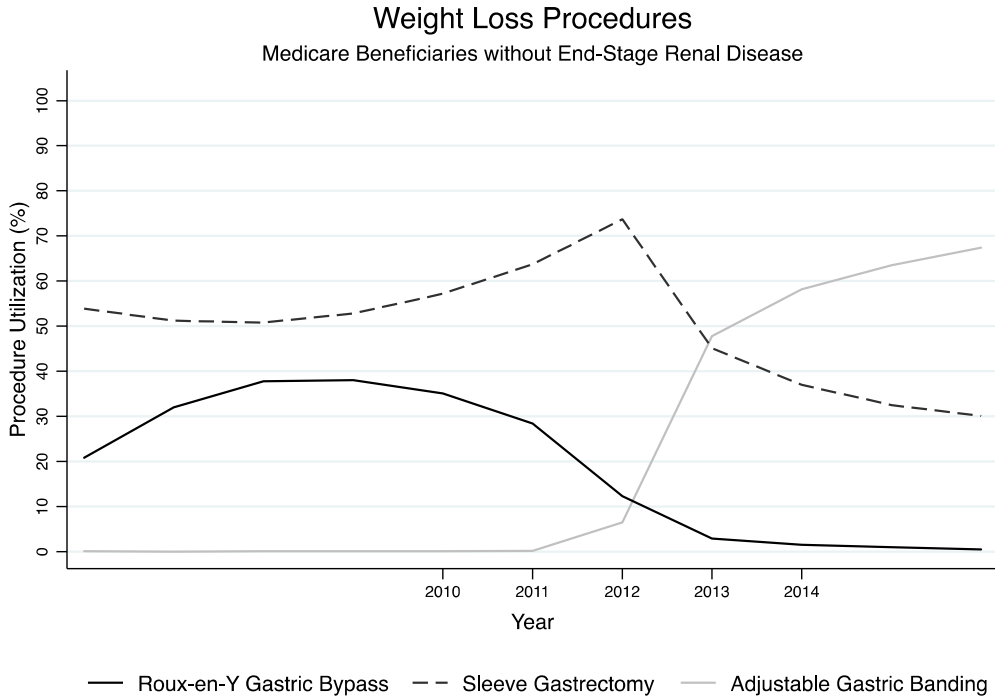



**Supplemental Table 4:** Cohort specifications (discrete codes for each bariatric procedure listed above in 1.1)

|                          |                                                                                                                                                                                                         |                                                                           |                                                                                                                                     |
|--------------------------|---------------------------------------------------------------------------------------------------------------------------------------------------------------------------------------------------------|---------------------------------------------------------------------------|-------------------------------------------------------------------------------------------------------------------------------------|
| <b>Bariatric surgery</b> | Any bariatric surgery (SX: 443, 4431, 4438, 4439, 4389, 4468, 4495, 4496, 4499, 445,4382) & diagnosis of morbid obesity (DX: 2780, 27801, and 27800, V778) & DRG 619, 620, 621 for weight loss surgery. | Exclude stomach or intestine cancers (DX: 1500 to 1599 and 2301 to 2309). | Sleeve gastrectomy (SX: 4389); Gastric banding (SX: 4495); Laparoscopic gastric bypass (SX: 4438); Conversion to open (DX: V64.41). |
|--------------------------|---------------------------------------------------------------------------------------------------------------------------------------------------------------------------------------------------------|---------------------------------------------------------------------------|-------------------------------------------------------------------------------------------------------------------------------------|

Medicare includes a special designating variable for patients with end-stage kidney disease. This information was corroborated with ICD-9 (58.56) or ICD-10 (N18.6) diagnosis codes from the primary claims file to identify all patients with end-stage kidney disease. We further verified the status of a prior kidney transplant and current dialysis status. Prior transplants were identified by ICD-9 (V42.0) and ICD-10 (Z94.0) codes. Patients were considered to be on dialysis if they had ESKD as well as ICD-9 (V45.11) and ICD-10 (Z99.2) codes for dialysis status.

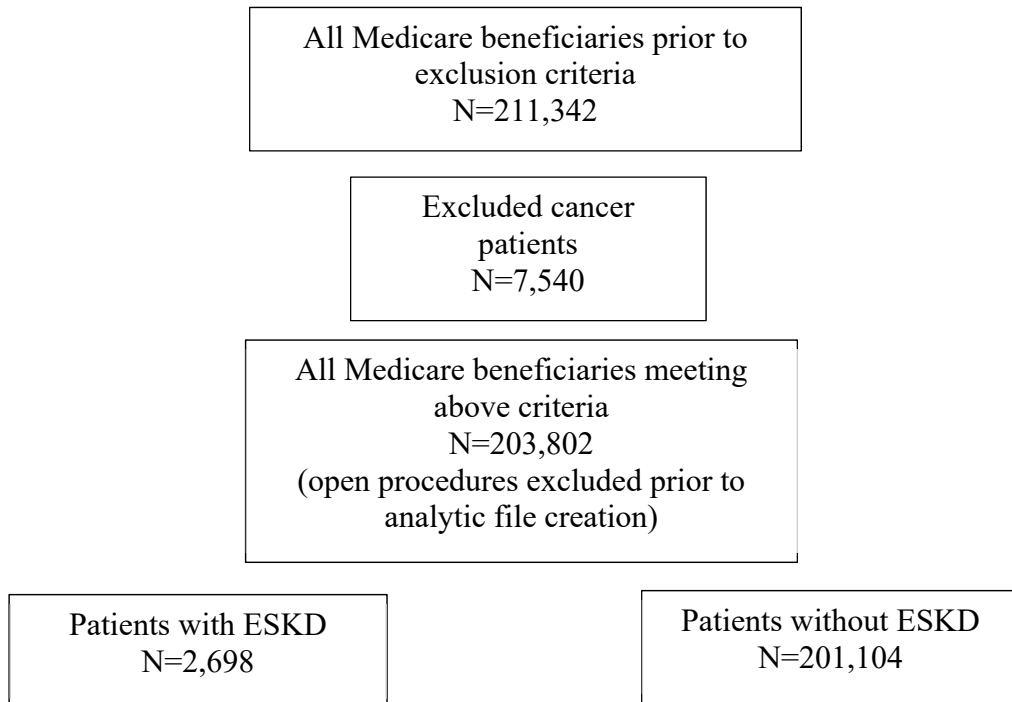

**Supplemental Table 5: Outcomes over time for patients with end-stage kidney disease**

Table. Risk-adjusted postoperative outcomes over time for patients with end-stage kidney disease

| Outcome                               | Time Period     |                 |                 | p-value |
|---------------------------------------|-----------------|-----------------|-----------------|---------|
|                                       | 2006-2008       | 2009-2013       | 2014-2016       |         |
| <b>Postoperative complications, %</b> | <b>N=32,577</b> | <b>N=92,223</b> | <b>N=76,879</b> |         |
| Laparoscopic sleeve gastrectomy       | 3.4             | 3.4             | 3.5             | 0.23    |
| 95% CI                                | (2.2, 4.5)      | (2.0, 4.8)      | (2.7, 4.2)      |         |
| Laparoscopic Roux-en-Y gastric bypass | 7.1             | 6.8             | 6.7             | 0.09    |
| 95% CI                                | (4.6, 9.2)      | (5.0, 8.1)      | (6.0, 7.4)      |         |
| Laparoscopic gastric banding          | 2.5             | 2.2             | 2.4             | 0.44    |
| 95% CI                                | (1.0, 4.1)      | (1.5, 3.0)      | (2.0, 2.8)      |         |
| <b>Length of stay, days</b>           |                 |                 |                 |         |
| Laparoscopic sleeve gastrectomy       | 2.8             | 2.3             | 2.2             | 0.07    |
| 95% CI                                | (2.6, 3.0)      | (2.0, 2.6)      | (2.0, 2.4)      |         |
| Laparoscopic Roux-en-Y gastric bypass | 3.6             | 3.7             | 3.2             | 0.13    |
| 95% CI                                | (3.2, 4.0)      | (3.5, 3.9)      | (3.0, 3.4)      |         |
| Laparoscopic gastric banding          | 1.5             | 1.6             | 1.4             | 0.62    |
| 95% CI                                | (1.4, 1.7)      | (1.3, 1.9)      | (1.2, 1.6)      |         |
| <b>Readmission, %</b>                 |                 |                 |                 |         |
| Laparoscopic sleeve gastrectomy       | 8.7             | 9.5             | 8.4             | 0.15    |
| 95% CI                                | (7.3, 10.1)     | (8.5, 10.5)     | (7.8, 9.0)      |         |
| Laparoscopic Roux-en-Y gastric bypass | 14.5            | 16.3            | 15.4            | 0.2     |
| 95% CI                                | (14.4, 18.4)    | (15.0, 17.5)    | (14.7, 16.1)    |         |
| Laparoscopic gastric banding          | 8.6             | 8.5             | 9.0             | 0.38    |
| 95% CI                                | (5.2, 11.0)     | (7.2, 9.3)      | (8.4, 9.6)      |         |

*P-value reflect the coefficient on the time period covariate in the Poisson model.*

**Supplemental Table 6: ICD-9 and 10 Codes for complications.**

| ICD10cm_code | ICD9cm_code | Short_description                                          |
|--------------|-------------|------------------------------------------------------------|
| I2109        | 41000       | STEMI involving oth coronary artery of anterior wall       |
| I2109        | 41001       | STEMI involving oth coronary artery of anterior wall       |
| I220         | 41001       | Subsequent STEMI of anterior wall                          |
| I2109        | 41002       | STEMI involving oth coronary artery of anterior wall       |
| I2109        | 41010       | STEMI involving oth coronary artery of anterior wall       |
| I2101        | 41011       | STEMI involving left main coronary artery                  |
| I2102        | 41011       | STEMI involving left anterior descending coronary artery   |
| I2109        | 41011       | STEMI involving oth coronary artery of anterior wall       |
| I220         | 41011       | Subsequent STEMI of anterior wall                          |
| I2109        | 41012       | STEMI involving oth coronary artery of anterior wall       |
| I2119        | 41020       | STEMI involving oth coronary artery of inferior wall       |
| I2119        | 41021       | STEMI involving oth coronary artery of inferior wall       |
| I221         | 41021       | Subsequent STEMI of inferior wall                          |
| I2119        | 41022       | STEMI involving oth coronary artery of inferior wall       |
| I2111        | 41030       | STEMI involving right coronary artery                      |
| I2111        | 41031       | STEMI involving right coronary artery                      |
| I221         | 41031       | Subsequent STEMI of inferior wall                          |
| I2111        | 41032       | STEMI involving right coronary artery                      |
| I2119        | 41040       | STEMI involving oth coronary artery of inferior wall       |
| I2119        | 41041       | STEMI involving oth coronary artery of inferior wall       |
| I221         | 41041       | Subsequent STEMI of inferior wall                          |
| I2119        | 41042       | STEMI involving oth coronary artery of inferior wall       |
| I2129        | 41050       | STEMI involving oth sites                                  |
| I2129        | 41051       | STEMI involving oth sites                                  |
| I228         | 41051       | Subsequent STEMI of sites                                  |
| I2129        | 41052       | STEMI involving oth sites                                  |
| I2129        | 41060       | STEMI involving oth sites                                  |
| I2129        | 41061       | STEMI involving oth sites                                  |
| I228         | 41061       | Subsequent STEMI of sites                                  |
| I2129        | 41062       | STEMI involving oth sites                                  |
| I214         | 41070       | Non-ST elevation (NSTEMI) myocardial infarction            |
| I214         | 41071       | Non-ST elevation (NSTEMI) myocardial infarction            |
| I222         | 41071       | Subsequent non-ST elevation (NSTEMI) myocardial infarction |
| I214         | 41072       | Non-ST elevation (NSTEMI) myocardial infarction            |
| I2129        | 41080       | STEMI involving oth sites                                  |
| I2121        | 41081       | STEMI involving left circumflex coronary artery            |
| I2129        | 41081       | STEMI involving oth sites                                  |
| I228         | 41081       | Subsequent STEMI of sites                                  |
| I2129        | 41082       | STEMI involving oth sites                                  |
| I213         | 41090       | ST elevation (STEMI) myocardial infarction of unsp site    |

*Supplemental material is neither peer-reviewed nor thoroughly edited by CJASN. The authors alone are responsible for the accuracy and presentation of the material.*

|        |       |                                                              |
|--------|-------|--------------------------------------------------------------|
| I213   | 41091 | ST elevation (STEMI) myocardial infarction of unsp site      |
| I229   | 41091 | Subsequent STEMI of unsp site                                |
| I2699  | 41511 | Other pulmonary embolism without acute cor pulmonale         |
| I2602  | 41513 | Saddle embolus of pulmonary artery with acute cor pulmonale  |
| I2692  | 41513 | Saddle embolus of pulmonary artery w/o acute cor pulmonale   |
| I2609  | 41519 | Other pulmonary embolism with acute cor pulmonale            |
| I2699  | 41519 | Other pulmonary embolism without acute cor pulmonale         |
| I8010  | 45111 | Phlebitis and thrombophlebitis of unspecified femoral vein   |
| I8011  | 45111 | Phlebitis and thrombophlebitis of right femoral vein         |
| I8012  | 45111 | Phlebitis and thrombophlebitis of left femoral vein          |
| I8013  | 45111 | Phlebitis and thrombophlebitis of femoral vein, bilateral    |
| I80201 | 45119 | Phlbt and thombophlb of unsp deep vessels of r low extrem    |
| I80202 | 45119 | Phlbt and thombophlb of unsp deep vessels of l low extrem    |
| I80203 | 45119 | Phlbt and thombophlb of unsp deep vessels of low extrm, bi   |
| I80209 | 45119 | Phlbt and thombophlb of unsp deep vessels of unsp low extrm  |
| I80221 | 45119 | Phlebitis and thrombophlebitis of right popliteal vein       |
| I80222 | 45119 | Phlebitis and thrombophlebitis of left popliteal vein        |
| I80223 | 45119 | Phlebitis and thrombophlebitis of popliteal vein, bilateral  |
| I80229 | 45119 | Phlebitis and thrombophlebitis of unspecified popliteal vein |
| I80231 | 45119 | Phlebitis and thrombophlebitis of right tibial vein          |
| I80232 | 45119 | Phlebitis and thrombophlebitis of left tibial vein           |
| I80233 | 45119 | Phlebitis and thrombophlebitis of tibial vein, bilateral     |
| I80239 | 45119 | Phlebitis and thrombophlebitis of unspecified tibial vein    |
| I80291 | 45119 | Phlebitis and thombophlb of deep vessels of r low extrem     |
| I80292 | 45119 | Phlebitis and thombophlb of deep vessels of l low extrem     |
| I80293 | 45119 | Phlebitis and thombophlb of deep vessels of low extrm, bi    |
| I80299 | 45119 | Phlebitis and thombophlb of deep vessels of unsp low extrm   |
| I803   | 4512  | Phlebitis and thrombophlebitis of lower extremities, unsp    |
| I80211 | 45181 | Phlebitis and thrombophlebitis of right iliac vein           |
| I80212 | 45181 | Phlebitis and thrombophlebitis of left iliac vein            |
| I80213 | 45181 | Phlebitis and thrombophlebitis of iliac vein, bilateral      |
| I80219 | 45181 | Phlebitis and thrombophlebitis of unspecified iliac vein     |
| I82621 | 45382 | Acute embolism and thrombosis of deep veins of r up extrem   |
| I82622 | 45382 | Acute embolism and thrombosis of deep veins of l up extrem   |
| I82623 | 45382 | Acute embolism and thombos of deep veins of up extrem, bi    |
| I82629 | 45382 | Acute embolism and thrombosis of deep vn unsp up extrem      |
| I82601 | 45383 | Acute embolism and thombos unsp veins of r up extrem         |
| I82602 | 45383 | Acute embolism and thombos unsp veins of l up extrem         |
| I82603 | 45383 | Acute embolism and thombos unsp veins of up extrem, bi       |
| I82609 | 45383 | Acute embolism and thombos unsp vn unsp upper extremity      |

*Supplemental material is neither peer-reviewed nor thoroughly edited by CJASN. The authors alone are responsible for the accuracy and presentation of the material.*

|         |       |                                                                                                                             |
|---------|-------|-----------------------------------------------------------------------------------------------------------------------------|
| I82A11  | 45384 | Acute embolism and thrombosis of right axillary vein                                                                        |
| I82A12  | 45384 | Acute embolism and thrombosis of left axillary vein                                                                         |
| I82A13  | 45384 | Acute embolism and thrombosis of axillary vein, bilateral                                                                   |
| I82A19  | 45384 | Acute embolism and thrombosis of unspecified axillary vein                                                                  |
| I82B11  | 45385 | Acute embolism and thrombosis of right subclavian vein                                                                      |
| I82B12  | 45385 | Acute embolism and thrombosis of left subclavian vein                                                                       |
| I82B13  | 45385 | Acute embolism and thrombosis of subclavian vein, bilateral<br>Acute embolism and thrombosis of unspecified subclavian vein |
| I82B19  | 45385 | Acute embolism and thrombosis of right internal jugular vein                                                                |
| I82C11  | 45386 | Acute embolism and thrombosis of left internal jugular vein                                                                 |
| I82C12  | 45386 | Acute embolism and thrombosis of int jugular vein, bilateral                                                                |
| I82C13  | 45386 | Acute embolism and thrombosis of unsp internal jugular vein                                                                 |
| I82C19  | 45386 | Acute embolism and thrombosis of other thoracic veins                                                                       |
| I82210  | 45387 | Acute embolism and thrombosis of other specified veins                                                                      |
| I82290  | 45387 | Acute embolism and thrombosis of unspecified vein                                                                           |
| I82890  | 45389 | Acute kidney failure with tubular necrosis                                                                                  |
| I8290   | 45389 | Acute kidney failure with acute cortical necrosis                                                                           |
| N170    | 5845  | Acute kidney failure with medullary necrosis                                                                                |
| N171    | 5846  | Other acute kidney failure                                                                                                  |
| N172    | 5847  | Acute kidney failure, unspecified                                                                                           |
| N178    | 5848  | Oth complications of surgical and medical care, NEC, init                                                                   |
| N179    | 5849  | Postp hematoma of a nervous sys org fol a nervous sys proc                                                                  |
| T888XXA | 99813 | Postproc hematoma of a circ sys org fol other circ sys proc                                                                 |
| G9761   | 99812 | Postproc hematoma of a circ sys org fol other procedure                                                                     |
| I97638  | 99812 | Postproc hematoma of a circ sys org following a cardiac cath                                                                |
| I97621  | 99812 | Postproc hematoma of a circ sys org following cardiac bypass                                                                |
| I97630  | 99812 | Postproc hematoma of a dgstv sys org fol a dgstv sys proc                                                                   |
| I97631  | 99812 | Postproc hematoma of a dgstv sys org fol other procedure                                                                    |
| K91870  | 99812 | Postproc hematoma of a GU sys org fol a GU sys procedure                                                                    |
| K91871  | 99812 | Postproc hematoma of a GU sys org following other procedure                                                                 |
| N99840  | 99812 | Postproc hematoma of a ms structure fol a ms sys procedure                                                                  |
| N99841  | 99812 | Postproc hematoma of a ms structure fol other procedure                                                                     |
| M96840  | 99812 | Postproc hematoma of a nervous sys org fol other procedure                                                                  |
| M96841  | 99812 | Postproc hematoma of a resp sys org fol a resp sys procedure                                                                |
| G9762   | 99812 | Postproc hematoma of a resp sys org fol other procedure                                                                     |
| J95860  | 99812 | Postproc hematoma of an endo sys org fol an endo sys proc                                                                   |
| J95861  | 99812 | Postproc hematoma of an endo sys org fol other procedure                                                                    |
| E89820  | 99812 | Postproc hematoma of ear/mastd following other procedure                                                                    |
| E89821  | 99812 | Postproc hematoma of eye and adnexa fol an ophth proc, bi                                                                   |
| H9552   | 99812 |                                                                                                                             |
| H59333  | 99812 |                                                                                                                             |

*Supplemental material is neither peer-reviewed nor thoroughly edited by CJASN. The authors alone are responsible for the accuracy and presentation of the material.*

|        |       |                                                              |
|--------|-------|--------------------------------------------------------------|
| H59343 | 99812 | Postproc hematoma of eye and adnexa fol other procedure, bi  |
| H59332 | 99812 | Postproc hematoma of left eye and adnexa fol an opth proc    |
| H59342 | 99812 | Postproc hematoma of left eye and adnexa fol other procedure |
| H59331 | 99812 | Postproc hematoma of right eye and adnexa fol an opth proc   |
| H59341 | 99812 | Postproc hematoma of right eye and adnexa fol other proc     |
| L7631  | 99812 | Postproc hematoma of skin, subcu fol a dermatologic proc     |
| L7632  | 99812 | Postproc hematoma of skin, subcu following other procedure   |
| D7832  | 99812 | Postproc hematoma of the spleen following other procedure    |
| H59339 | 99812 | Postproc hematoma of unsp and adnexa fol an opth procedure   |
| H59349 | 99812 | Postproc hematoma of unsp and adnexa fol other procedure     |
| I97618 | 99811 | Postproc hemor of a circ sys org fol other circ sys proc     |
| I97610 | 99811 | Postproc hemor of a circ sys org following a cardiac cath    |
| I97611 | 99811 | Postproc hemor of a circ sys org following cardiac bypass    |
| I97620 | 99811 | Postproc hemor of a circ sys org following other procedure   |
| K91840 | 99811 | Postproc hemor of a dgstv sys org fol a dgstv sys procedure  |
| K91841 | 99811 | Postproc hemor of a dgstv sys org following other procedure  |
| N99820 | 99811 | Postproc hemor of a GU sys org following a GU sys procedure  |
| N99821 | 99811 | Postproc hemor of a GU sys org following other procedure     |
| M96830 | 99811 | Postproc hemor of a ms structure fol a ms sys procedure      |
| M96831 | 99811 | Postproc hemor of a ms structure following other procedure   |
| G9751  | 99811 | Postproc hemor of a nervous sys org fol a nervous sys proc   |
| G9752  | 99811 | Postproc hemor of a nervous sys org fol other procedure      |
| J95830 | 99811 | Postproc hemor of a resp sys org fol a resp sys procedure    |
| J95831 | 99811 | Postproc hemor of a resp sys org following other procedure   |
| E89810 | 99811 | Postproc hemor of an endo sys org fol an endo sys procedure  |
| E89811 | 99811 | Postproc hemor of an endo sys org following other procedure  |
| H59313 | 99811 | Postproc hemor of eye and adnexa fol an opth procedure, bi   |
| H59323 | 99811 | Postproc hemor of eye and adnexa fol other procedure, bi     |
| H59312 | 99811 | Postproc hemor of left eye and adnexa fol an opth procedure  |
| H59322 | 99811 | Postproc hemor of left eye and adnexa fol other procedure    |
| H59311 | 99811 | Postproc hemor of right eye and adnexa fol an opth procedure |
| H59321 | 99811 | Postproc hemor of right eye and adnexa fol other procedure   |
| L7621  | 99811 | Postproc hemor of skin, subcu fol a dermatologic procedure   |
| H59319 | 99811 | Postproc hemor of unsp and adnexa fol an opth procedure      |
| H59329 | 99811 | Postproc hemor of unsp and adnexa following other procedure  |
| H9542  | 99811 | Postproc hemorrhage of ear/mastd following other procedure   |
| L7622  | 99811 | Postproc hemorrhage of skin, subcu following other procedure |

*Supplemental material is neither peer-reviewed nor thoroughly edited by CJASN. The authors alone are responsible for the accuracy and presentation of the material.*

|         |       |                                                              |
|---------|-------|--------------------------------------------------------------|
| D7822   | 99811 | Postproc hemorrhage of the spleen following other procedure  |
| H9551   | 99812 | Postprocedural hematoma of ear/mastd fol proc on ear/mastd   |
| D7831   | 99812 | Postprocedural hematoma of the spleen fol proc on spleen     |
| H9541   | 99811 | Postprocedural hemorrhage of ear/mastd fol proc on ear/mastd |
| D7821   | 99811 | Postprocedural hemorrhage of the spleen fol proc on spleen   |
| T798XXA | 9583  | Other early complications of trauma, initial encounter       |
| T8130XA | 99830 | Disruption of wound, unspecified, initial encounter          |
| T8132XA | 99831 | Disruption of internal operation (surgical) wound, NEC, init |
| T8131XA | 99832 | Disruption of external operation (surgical) wound, NEC, init |
| T8133XA | 99833 | Disruption of traumatic injury wound repair, init encntr     |
| T814XXA | 99851 | Infection following a procedure, initial encounter           |
| K6811   | 99859 | Postprocedural retroperitoneal abscess                       |
| T814XXA | 99859 | Infection following a procedure, initial encounter           |
| K260    | 53200 | Acute duodenal ulcer with hemorrhage                         |
| K262    | 53220 | Acute duodenal ulcer with both hemorrhage and perforation    |
| K262    | 53221 | Acute duodenal ulcer with both hemorrhage and perforation    |
| K270    | 53300 | Acute peptic ulcer, site unspecified, with hemorrhage        |
| K270    | 53301 | Acute peptic ulcer, site unspecified, with hemorrhage        |
| K271    | 53310 | Acute peptic ulcer, site unspecified, with perforation       |
| K271    | 53311 | Acute peptic ulcer, site unspecified, with perforation       |
| K272    | 53320 | Acute peptic ulcer, site unsp, w both hemorrhage and perf    |
| K272    | 53321 | Acute peptic ulcer, site unsp, w both hemorrhage and perf    |
| K280    | 53400 | Acute gastrojejunal ulcer with hemorrhage                    |
| K280    | 53401 | Acute gastrojejunal ulcer with hemorrhage                    |
| K281    | 53410 | Acute gastrojejunal ulcer with perforation                   |
| K281    | 53411 | Acute gastrojejunal ulcer with perforation                   |
| K282    | 53420 | Acute gastrojejunal ulcer w both hemorrhage and perforation  |
| K282    | 53421 | Acute gastrojejunal ulcer w both hemorrhage and perforation  |
| K2901   | 53501 | Acute gastritis with bleeding                                |
| K2951   | 53511 | Unspecified chronic gastritis with bleeding                  |
| K2961   | 53521 | Other gastritis with bleeding                                |
| K2921   | 53531 | Alcoholic gastritis with bleeding                            |
| K2961   | 53541 | Other gastritis with bleeding                                |
| K2971   | 53551 | Gastritis, unspecified, with bleeding                        |
| K2991   | 53551 | Gastroduodenitis, unspecified, with bleeding                 |
| K2981   | 53561 | Duodenitis with bleeding                                     |
| K922    | 5789  | Gastrointestinal hemorrhage, unspecified                     |
| J9600   | 51881 | Acute respiratory failure, unsp w hypoxia or hypercapnia     |
| J9601   | 51881 | Acute respiratory failure with hypoxia                       |
| J9602   | 51881 | Acute respiratory failure with hypercapnia                   |



*Supplemental material is neither peer-reviewed nor thoroughly edited by CJASN. The authors alone are responsible for the accuracy and presentation of the material.*

|        |       |                                                                                                    |
|--------|-------|----------------------------------------------------------------------------------------------------|
| J9690  | 51881 | Respiratory failure, unsp, unsp w hypoxia or hypercapnia                                           |
| J9691  | 51881 | Respiratory failure, unspecified with hypoxia                                                      |
| J9692  | 51881 | Respiratory failure, unspecified with hypercapnia                                                  |
| J80    | 51882 | Acute respiratory distress syndrome                                                                |
| J9620  | 51884 | Acute and chr resp failure, unsp w hypoxia or hypercapnia                                          |
| J9621  | 51884 | Acute and chronic respiratory failure with hypoxia                                                 |
| J9622  | 51884 | Acute and chronic respiratory failure with hypercapnia                                             |
| J13    | 481   | Pneumonia due to Streptococcus pneumoniae                                                          |
| J181   | 481   | Lobar pneumonia, unspecified organism                                                              |
| J150   | 4820  | Pneumonia due to Klebsiella pneumoniae                                                             |
| J151   | 4821  | Pneumonia due to Pseudomonas                                                                       |
| J14    | 4822  | Pneumonia due to Hemophilus influenzae                                                             |
| J154   | 48230 | Pneumonia due to other streptococci                                                                |
| J154   | 48231 | Pneumonia due to other streptococci                                                                |
| J153   | 48232 | Pneumonia due to streptococcus, group B                                                            |
| J154   | 48239 | Pneumonia due to other streptococci                                                                |
| J1520  | 48240 | Pneumonia due to staphylococcus, unspecified                                                       |
| J15211 | 48241 | Pneumonia due to methicillin suscep staph<br>Pneumonia due to Methicillin resistant Staphylococcus |
| J15212 | 48242 | aureus                                                                                             |
| J1529  | 48249 | Pneumonia due to other staphylococcus                                                              |
| J158   | 48281 | Pneumonia due to other specified bacteria                                                          |
| J155   | 48282 | Pneumonia due to Escherichia coli                                                                  |
| J156   | 48283 | Pneumonia due to other aerobic Gram-negative bacteria                                              |
| A481   | 48284 | Legionnaires' disease                                                                              |
| J158   | 48289 | Pneumonia due to other specified bacteria                                                          |
| J159   | 4829  | Unspecified bacterial pneumonia                                                                    |
| J157   | 4830  | Pneumonia due to Mycoplasma pneumoniae                                                             |
| J160   | 4831  | Chlamydial pneumonia                                                                               |
| J168   | 4838  | Pneumonia due to other specified infectious organisms                                              |
| B250   | 4841  | Cytomegaloviral pneumonitis                                                                        |
| A221   | 4845  | Pulmonary anthrax                                                                                  |
| B440   | 4846  | Invasive pulmonary aspergillosis                                                                   |
| J17    | 4847  | Pneumonia in diseases classified elsewhere                                                         |
| B7781  | 4848  | Ascariasis pneumonia                                                                               |
| J17    | 4848  | Pneumonia in diseases classified elsewhere                                                         |
| J180   | 485   | Bronchopneumonia, unspecified organism                                                             |
| J690   | 5070  | Pneumonitis due to inhalation of food and vomit                                                    |
